# Supplementary material for: Targeting CD74 in B-cell non-Hodgkin lymphoma with the antibody-drug conjugate STRO-001
Source: PubMed Central journal article supplement (PMC9836384; doi:10.18632/oncotarget.28341), 2023-01-12
Supplement: oncotarget-14-28341-s001.pdf [file oncotarget-14-28341-s001.pdf]

## Targeting CD74 in B-cell non-Hodgkin lymphoma with the antibody-drug conjugate STRO-001

### SUPPLEMENTARY MATERIALS

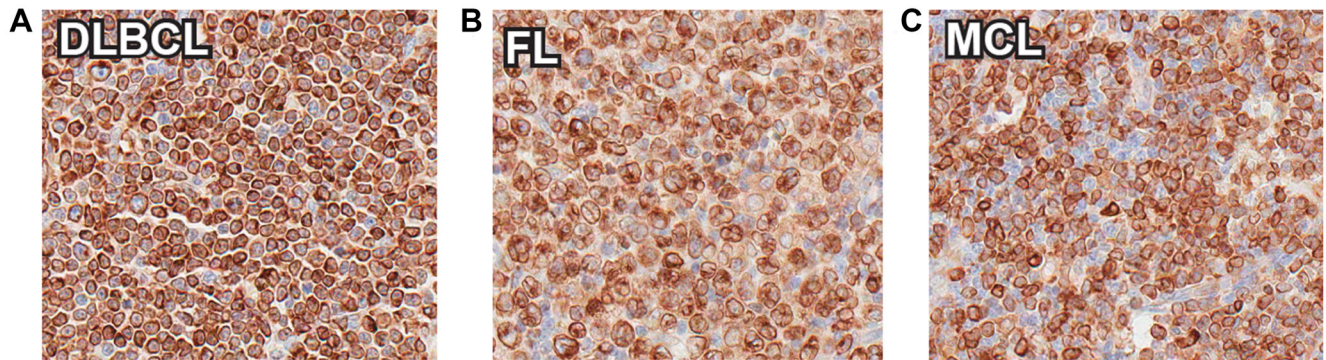

**Supplementary Figure 1: CD74 expression in NHL tissue microarrays.** Representative IHC images at 40× magnification of CD74 staining in DLBCL (A), FL (B) and MCL (C) tissue microarrays.

**Supplementary Table 1: CD74 is highly expressed in NHL tissue microarrays by immunohistochemistry**

| Histology | Frequency |       |        |        | Intensity |       |        |        |
|-----------|-----------|-------|--------|--------|-----------|-------|--------|--------|
|           | 0         | 1     | 2      | 3      | 0         | 1     | 2      | 3      |
| DLBCL     | 0/100     | 4/100 | 10/100 | 86/100 | 0/100     | 4/100 | 31/100 | 65/100 |
| FL        | 0/28      | 1/28  | 5/28   | 22/28  | 0/28      | 1/28  | 10/28  | 17/28  |
| MCL       | 5/78      | 12/78 | 12/78  | 49/78  | 5/78      | 24/78 | 32/78  | 17/78  |

Specific binding of the biotinylated anti-CD74 antibody to the tumor microarrays was analyzed and scored. Staining frequency: 0: no labeled cells; 1: rare (0–30% of cells); 2: occasional (31–70% of cells); 3: frequent (>70% of cells). Staining intensity: 0: no labeled cells; 1: mild; 2: moderate; 3: marked. Abbreviations: DLBCL: diffuse large B-cell lymphoma; FL: follicular lymphoma; MCL: mantle cell lymphoma.

**Supplementary Table 2: Commercial antibodies used to label different immune cell populations for human bone marrow aspirate**

| Set | Cell type    | Immunotype  | Antigen | Fluor | Reactivity | Vendor         | Clone  |
|-----|--------------|-------------|---------|-------|------------|----------------|--------|
| 1   | T cells      | CD3+        | CD3     | PE    | Hu, Cy     | BD Biosciences | SP34   |
|     | B cells      | CD20+       | CD20    | FITC  | Hu, Cy     | BD Biosciences | L27    |
| 2   | Granulocytes | CD66b+      | CD66b   | FITC  | Hu         | eBio           | G10F5  |
|     | NK cells     | CD56+       | CD56    | PE    | Hu, Cy     | eBio           | TULY56 |
| 3   | Monocytes    | CD14+       | CD14    | PE    | Hu, Cy     | BD Biosciences | M5E2   |
|     | Neutrophils  | CD16+       | CD16    | FITC  | Hu         | Biologend      | 3G8    |
| 4   | Myelocyte    | CD33+/CD16– | CD16    | PE    | Hu         | Biologend      | 3G8    |
|     |              |             | CD33    | FITC  | Hu, Cy     | Miltenyi       | REA775 |
| 5   | Stem cells   | CD34+       | CD34    | FITC  | Hu, Cy     | Biologend      | 561    |

Abbreviations: Cy: cynomolgus monkey; FITC: fluorescein isothiocyanate; Hu: human; PE: phycoerythrin.

**Supplementary Table 3: Commercial antibodies used to label different immune cell populations for cynomolgus monkey bone marrow aspirate**

| Set | Cell type  | Immunotype | Antigen | Fluor | Reactivity | Vendor         | Clone  |
|-----|------------|------------|---------|-------|------------|----------------|--------|
| 1   | T cells    | CD3+       | CD3     | PE    | Hu, Cy     | BD Biosciences | SP34   |
|     | B cells    | CD20+      | CD20    | FITC  | Hu, Cy     | BD Biosciences | L27    |
| 2   | NK cells   | CD56+      | CD56    | PE    | Hu, Cy     | eBio           | TULY56 |
| 3   | Monocytes  | CD14+      | CD14    | PE    | Hu, Cy     | BD Biosciences | M5E2   |
| 4   | Myelocytes | CD33+      | CD33    | FITC  | Hu, Cy     | Miltenyi       | REA775 |
| 5   | Stem cells | CD34+      | CD34    | FITC  | Hu, Cy     | Biologend      | 561    |

Abbreviations: Cy: cynomolgus monkey; FITC: fluorescein isothiocyanate; Hu: human; PE: phycoerythrin.

**Supplementary Table 4: Relative CD74 expression on different immune cell populations in bone marrow from five healthy human donors**

| Cell type    | Donor 1 | Donor 2 | Donor 3 | Donor 4 | Donor 5 |
|--------------|---------|---------|---------|---------|---------|
| B cells      |         |         |         |         |         |
| Percentage   | 1.3     | 0.9     | 1.0     | 0.9     | 1.2     |
| MFI ratio    | 1.8     | 2.0     | 1.4     | 1.7     | 1.6     |
| T cells      |         |         |         |         |         |
| Percentage   | 4.9     | 6.3     | 6.3     | 10.1    | 6.4     |
| MFI ratio    | 0.4     | 0.6     | 0.5     | 0.6     | 0.5     |
| Granulocytes |         |         |         |         |         |
| Percentage   | 81.5    | 67.0    | 75.8    | 67.4    | 65.0    |
| MFI ratio    | 0.7     | 0.7     | 0.8     | 0.8     | 0.7     |
| NK cells     |         |         |         |         |         |
| Percentage   | 1.5     | 2.0     | 1.3     | 3.5     | 2.5     |
| MFI ratio    | 0.5     | 0.6     | 0.5     | 0.6     | 0.7     |
| Monocytes    |         |         |         |         |         |
| Percentage   | 2.6     | 4.6     | 3.7     | 5.6     | 5.5     |
| MFI ratio    | 0.5     | 1.0     | 0.6     | 1.0     | 0.9     |
| Neutrophils  |         |         |         |         |         |
| Percentage   | 17.8    | 47.0    | 36.4    | 37.4    | 37.2    |
| MFI ratio    | 0.6     | 0.7     | 0.7     | 0.7     | 0.7     |
| Myelocytes   |         |         |         |         |         |
| Percentage   | 10.4    | 8.5     | 11.2    | 16.5    | 11.4    |
| MFI ratio    | 0.9     | 0.9     | 0.9     | 0.9     | 0.9     |
| Stem cells   |         |         |         |         |         |
| Percentage   | 0.8     | 0.8     | 0.9     | 1.0     | 1.0     |
| MFI ratio    | 0.5     | 0.5     | 0.4     | 0.6     | 0.4     |

Relative CD74 expression was indicated by MFI ratio of fluorescent labeled ant-CD74 antibody (SP9241)/fluorescent labeled ant-GFP antibody (SP9367).

**Supplementary Table 5: Relative CD74 expression on different immune cell populations in bone marrow from five healthy cynomolgus monkeys**

| Cell type  | Donor 1 | Donor 2 | Donor 3 | Donor 4 | Donor 5 |
|------------|---------|---------|---------|---------|---------|
| B cells    |         |         |         |         |         |
| Percentage | 5.6     | 3.2     | 11.8    | 5.3     | 5.3     |
| MFI ratio  | 5.2     | 2.0     | 7.3     | 5.2     | 4.3     |
| T cells    |         |         |         |         |         |
| Percentage | 21.5    | 8.2     | 23.3    | 8.0     | 8.0     |
| MFI ratio  | 1.1     | 0.9     | 1.0     | 1.0     | 0.9     |
| NK cells   |         |         |         |         |         |
| Percentage | 9.5     | 9.0     | 4.2     | 8.1     | 12.4    |
| MFI ratio  | 1.7     | 1.3     | 2.1     | 1.6     | 1.3     |
| Monocytes  |         |         |         |         |         |
| Percentage | 22.1    | 17.0    | 16.5    | 24.4    | 24.0    |
| MFI ratio  | 1.1     | 1.1     | 1.2     | 1.1     | 1.1     |
| Myelocytes |         |         |         |         |         |
| Percentage | 4.0     | 4.7     | 3.7     | 7.1     | 5.1     |
| MFI ratio  | 1.1     | 1.1     | 1.0     | 1.0     | 1.0     |
| Stem cells |         |         |         |         |         |
| Percentage | 0.1     | 0.4     | 0.2     | 0.3     | 0.8     |
| MFI ratio  | NE*     | NE*     | NE*     | NE*     | 1.6     |

Relative CD74 expression was indicated by MFI ratio of fluorescent labeled ant-CD74 antibody (SP9241)/fluorescent labeled ant-GFP antibody (SP9367). \*Not evaluable; insufficient number of cells analyzed to determine MFI ratio.

**Supplementary Table 6: Antiproliferative activity of STRO-001 in naïve and proliferating primary human B cells**

| Cell type             | Donor #1  |          | Donor #2  |          | Donor #4  |          |
|-----------------------|-----------|----------|-----------|----------|-----------|----------|
|                       | EC50 (nM) | Span (%) | EC50 (nM) | Span (%) | EC50 (nM) | Span (%) |
| Naive B cells         | 18        | 34       | 1.9       | 41       | 10        | 31       |
| Proliferating B cells | 0.26      | 87       | 0.23      | 97       | 0.49      | 92       |
